# Supplementary material
Source: PubMed Central journal article supplement (PMC7160419)
Supplement: ONCO-25-e659-s001.pdf [file ONCO-25-e659-s001.pdf]

Supplemental Appendix for:  
 Development and validation of a prognostic nomogram to guide decision-making for high-grade digestive neuroendocrine neoplasms  
 Tao Zhanget al.

## Supplementary Appendix

### Repeated with a imputed dataset after multiple imputation

#### For nomogram after multiple imputation

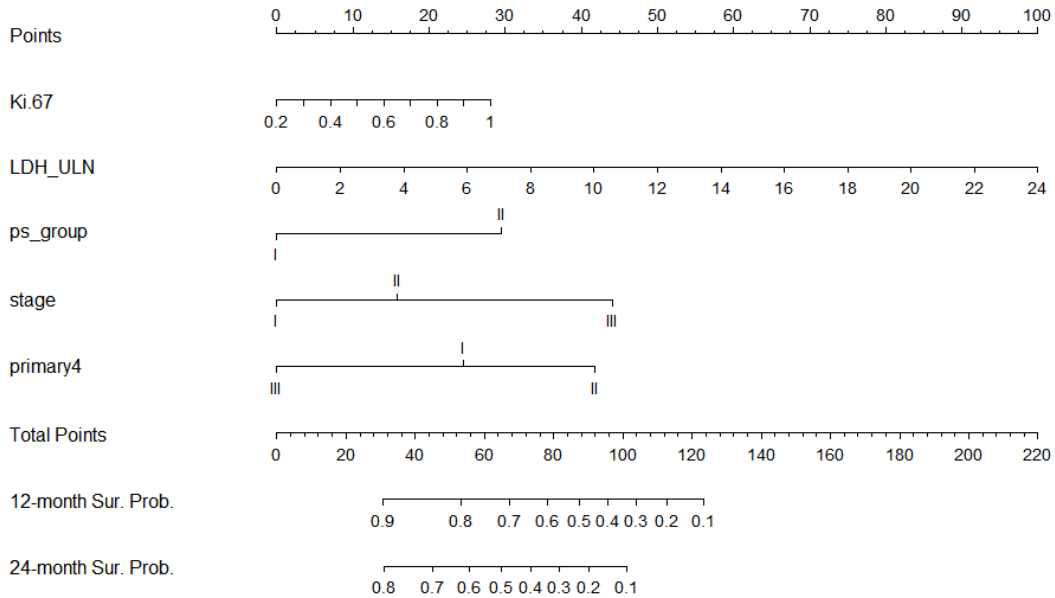

Footnotes: LDH\_UNL= Lactate dehydrogenase (upper normal limit); PS\_GROUP= Performance status group (I: 0-1; II:  $\geq 2$ ); Stage: I=Localized, II=Regional, III=Distant; primary4 = site of primary tumor (I= Gastrointestinal tract, II= Hepato-biliary-pancreatic system, III=Unknown primary);

**For calibration plot at 1 year in the development cohort**

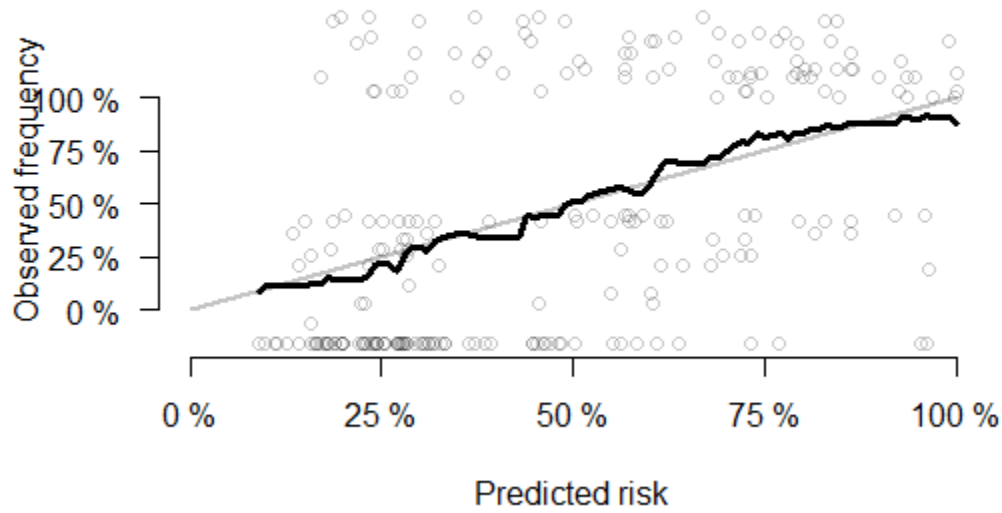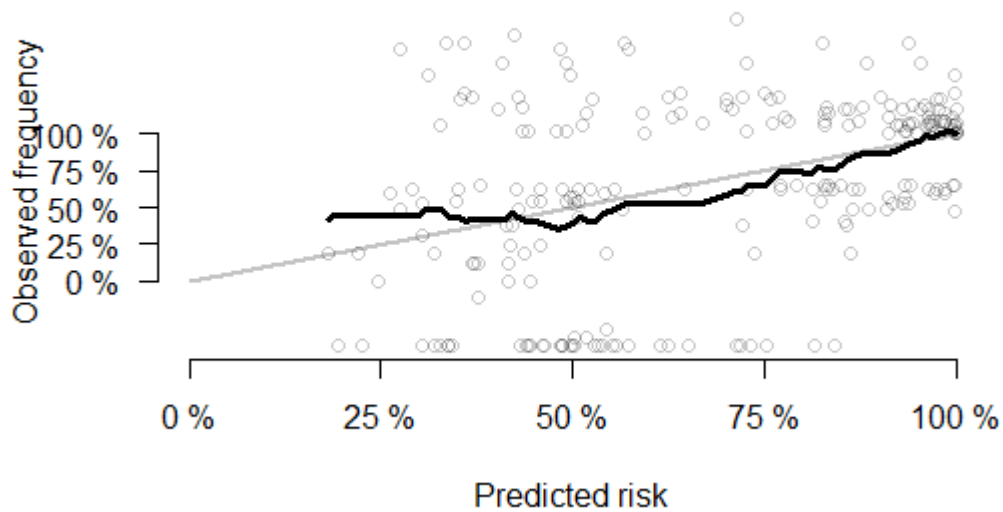

**For calibration plot at 2 year in the development cohort**

**For AUC in the development cohort after multiple imputation**

model times      AUC      se      lower      upper

```
1: coxph 6months 0.8032137 0.03497937 0.7346554 0.8717720
2: coxph 12months 0.8327024 0.03295456 0.7681127 0.8972922
3: coxph 24months 0.7856507 0.03880295 0.7095983 0.8617031
```

### **For AUC in the validation cohort after multiple imputation**

```
model times      AUC      se  lower  upper
1: coxph  6 months 0.7474382 0.06881793 0.6125575 0.8823189
2: coxph 12months 0.7988768 0.06123301 0.6788623 0.9188913
3: coxph 24months 0.8284224 0.06383747 0.7033033 0.9535416
```

### **Supplementary R packages and related codes**

The packages in R and the related codes that were used in this study are reported as follows:

```
>library(survival)
```

```
>library(riskRegression)
```

```
>library(table1)
```

```
>library(mice)
```

```
>library(QuantPsyc)
```

```
>library(rms)
```

#### **#AIC for selecting Variables**

```
>XHNO<-
```

```
coxph(Surv(os,mortality)~ps_group+stage+Ki.67+primary4+LDH_ULN+ALP_ULN+NLR+live
rM,xh, y=TRUE, x = TRUE)
```

```
>XHNO.backward=stepAIC(XHNO, direction="backward")
```

Start: AIC=727.38

Surv(os, mortality) ~ ps\_group + stage + Ki.67 + primary4 + LDH\_ULN +

ALP\_ULN + NLR + liverM

Df AIC

- liverM 1 725.45

- ALP\_ULN 1 726.42

- NLR 1 727.32

<none> 727.38

- primary4 2 729.65

- stage 2 731.85

- Ki.67 1 733.24

- LDH\_ULN 1 733.51

- ps\_group 1 734.75

Step: AIC=725.45

Surv(os, mortality) ~ ps\_group + stage + Ki.67 + primary4 + LDH\_ULN +

ALP\_ULN + NLR

Df AIC

- ALP\_ULN 1 724.51

- NLR 1 725.32

<none> 725.45

- primary4 2 727.71

- Ki.67 1 731.26

- LDH\_ULN 1 731.81

- ps\_group 1 732.77

- stage 2 738.18

Step: AIC=724.51

Surv(os, mortality) ~ ps\_group + stage + Ki.67 + primary4 + LDH\_ULN +  
NLR

Df AIC

- NLR 1 724.46

<none> 724.51

- primary4 2 727.37

- Ki.67 1 730.37

- LDH\_ULN 1 730.82

- ps\_group 1 731.87

- stage 2 737.59

Step: AIC=724.46

Surv(os, mortality) ~ ps\_group + stage + Ki.67 + primary4 + LDH\_ULN

Df AIC

<none> 724.46

- primary4 2 727.96

- Ki.67 1 731.28

- LDH\_ULN 1 732.30

- ps\_group 1 733.98

- stage 2 739.04

**# For Nomogram**

```

>noldh=cph(Surv(os,mortality)~Ki.67 + LDH_ULN + ps_group +
           stage + primary4, xh, surv=TRUE)

>ddist <- datadist(xh)

>options(datadist='ddist')

>surv.cox <- Survival(noldh)

>nom.cox <- nomogram(noldh, fun=list(function(x) surv.cox(12, x), function(x) surv.cox(24,
x)), funlabel=c("12-month Sur. Prob.", "24-month Sur. Prob."),lp=F)

>nom.cox

>plot(nom.cox )

```

### **# For Computing the C-Index and 95% CI**

```

>v=validate(XH2, method="boot",dxy=TRUE, B=1000)

>Dxy = v[rownames(v)=="Dxy", colnames(v)=="index.corrected"]

>orig_Dxy = v[rownames(v)=="Dxy", colnames(v)=="index.orig"]

>bias_corrected_c_index <- abs(Dxy)/2+0.5

>orig_c_index <- abs(orig_Dxy)/2+0.5

```

### **# For Calibration Curve and AUC**

```

>score=Score(list(XH2),formula=Surv(os,mortality)~1,data=xh,
             plot=c("calibration", "ROC"), summary = "risks",times=c(6,12,24))

>plotCalibration(score,times = 12)

>score$AUC$score

>ggplot(data = score$AUC$score, aes(x=times,y=AUC,colour=model))+
  geom_point()+ geom_line()

```

### **# For Calibration with internally cross validation method**

```
>score.cv=Score(list(XH2),formula=Surv(os,mortality)~1,data=xh,plot=c("calibration", "ROC"),
split.method="bootcv", B=1000,plots = "calibration",
summary = "risks", times=c(6,12,24))
```

**# For External Validation of Nomogram and Calibration Curve for Validation Cohort**

```
>PNI<-coxph(Surv(os,mortality)~ score, zs4,y=TRUE, x = TRUE)
```

```
>summary(PNI) , 95%CI, 1.96 × se; se = S.D./2
```

```
>v=validate(PNI, method="boot",dxy=TRUE, B=1000)
```

```
>Score.ex=Score(list(PNI),formula=Surv(os,mortality)~1,data=zs4,
```

```
plot=c("calibration", "ROC"),
```

```
summary = "risks",times=c(6,12,24))
```

**# For multiple imputation**

```
>imp <- mice(cb, seed=12345)
```

```
>cb2<-with(imp,coxph(Surv(os,mortality)~ps_group+stage+Ki.67+primary4+LDH_ULN,
y=TRUE, x = TRUE))
```

```
> dt5<-complete(imp2, action=5)
```

```
> cb5<-coxph(Surv(os,mortality)~ps_group+stage+Ki.67+primary4+LDH_ULN,dt5, y=TRUE,
x = TRUE)
```

```
coef exp(coef) se(coef) z Pr(>|z|)
```

```
ps_groupII 0.97656 2.65531 0.25631 3.810 0.000139 ***
```

```
stageII 0.52596 1.69208 0.44962 1.170 0.242091
```

```
stageIII 1.46565 4.33035 0.44340 3.305 0.000948 ***
```

```
Ki.67 1.16505 3.20608 0.50036 2.328 0.019890 *
```

```
primary4II 0.57247 1.77264 0.22000 2.602 0.009263 **
```

primary4III -0.81284 0.44359 0.49305 -1.649 0.099228 .

LDH\_ULN 0.13835 1.14838 0.03223 4.293 1.76e-05 \*\*\*
