# Supplementary material
Source: PubMed Central journal article supplement (PMC7160419)
Supplement: ONCO-25-e659-s003.pdf [file ONCO-25-e659-s003.pdf]

Supplemental Tables for:  
 Development and validation of a prognostic nomogram to guide decision-making for high-grade digestive neuroendocrine neoplasms  
 Tao Zhanget al.

**Supplementary Table S1.** Univariate and multivariable analysis of prognostic factors in the Training Cohort

| Prognostic Factors Training Cohort | Univariate Cox Regression |        | MAXIMUM REGRESSION MODEL<br>Multivariable Cox Regression |        | FINAL REGRESSION MODEL<br>Multivariable Cox Regression |        |
|------------------------------------|---------------------------|--------|----------------------------------------------------------|--------|--------------------------------------------------------|--------|
|                                    | HR (95% CI)               | P      | HR (95% CI)                                              | P      | HR (95% CI)                                            | P      |
| Age, continuous variable           | 1.001 (0.98-1.02)         | 0.884  | Not included                                             | --     | Not included                                           | --     |
| Gender                             |                           |        | Not included                                             | --     | Not included                                           | --     |
| Female                             | 1                         |        |                                                          |        |                                                        |        |
| Male                               | 0.77(0.52-1.14)           | 0.185  |                                                          |        |                                                        |        |
| Ki.67, continuous variable         | 2.07(0.81-5.33)           | 0.138  | 4.93(1.56-15.55)                                         | 0.007  | 5.47(1.72-17.34)                                       | 0.004  |
| Neutrophil-to-lymphocyte ratio     | 1.16 (1.08-1.24)          | <0.001 | 1.07(0.98-1.18)                                          | 0.147  | Not included                                           |        |
| Platelet,10 <sup>9</sup> /L        | 1.001 (0.99-1.003)        | 0.435  | Not included                                             | --     | Not included                                           |        |
| Alkaline phosphatase, UNL          | 1.22(1.05-1.43)           | 0.011  | 1.12(0.91-1.37)                                          | 0.280  | Not included                                           |        |
| Lactate dehydrogenase, UNL         | 1.32(1.19-1.47)           | <0.001 | 1.14(1.06-1.22)                                          | <0.001 | 1.15(1.07-1.23)                                        | <0.001 |
| Performance status                 |                           |        |                                                          |        |                                                        |        |
| 0-1                                | 1                         |        | 1                                                        |        | 1                                                      |        |
| 2-3                                | 2.38(1.46-3.87)           | <0.001 | 2.51(1.45-4.33)                                          | <0.001 | 2.71(1.60-4.60)                                        | <0.001 |
| MANEC, Yes                         | 0.62(0.32-1.19)           | 0.149  | Not included                                             | --     |                                                        |        |
| Stage                              |                           |        |                                                          |        |                                                        |        |
| Localized                          | 1                         |        | 1                                                        |        | 1                                                      |        |
| Regional                           | 1.56(0.65-3.71)           | 0.317  | 2.70 (0.62-11.68)                                        | 0.184  | 2.96(0.69-12.79)                                       | 0.145  |
| Distant                            | 4.41(1.91-10.19)          | <0.001 | 6.11(1.30-28.74)                                         | 0.022  | 7.42(1.73-31.85)                                       | 0.007  |
| Presence of liver metastases, yes  | 2.59(1.76-3.81)           | <0.001 | 1.09(0.59- 1.999)                                        | 0.786  |                                                        |        |
| Site of primary tumor              |                           |        |                                                          |        |                                                        |        |
| Gastrointestinal tract             | 1                         |        | 1                                                        |        | 1                                                      |        |
| Hepato-biliary-pancreatic system   | 2.65(1.80-3.90)           | <0.001 | 1.69(1.01-2.82)                                          | 0.044  | 1.76(1.06-2.92)                                        | 0.028  |

---

|                 |                 |       |                 |       |                 |       |
|-----------------|-----------------|-------|-----------------|-------|-----------------|-------|
| Unknown primary | 0.86(0.34-2.16) | 0.749 | 0.70(0.23-2.12) | 0.527 | 0.67(0.23-1.98) | 0.468 |
|-----------------|-----------------|-------|-----------------|-------|-----------------|-------|

---

HR=hazard ratio; CI= Confidence interval ; UNL, upper normal limit; MANEC, mixed adenoneuroendocrine carcinoma.

**Supplemental Table S2.** Overall survival nomogram scoring system

| Performance Status  | Points                  | Stage     | Points | Ki67                | Points                  | Site of primary tumor            | Points | Lactate dehydrogenase,<br>upper normal limit | Points |
|---------------------|-------------------------|-----------|--------|---------------------|-------------------------|----------------------------------|--------|----------------------------------------------|--------|
| 0-1                 | 0                       | Localized | 0      | 0.20                | 0                       | Gastrointestinal tract           | 12     | 0                                            | 0      |
| 2-3                 | 31                      | Regional  | 61     | 0.30                | 5                       | Hepato-biliary-pancreatic system | 30     | 2                                            | 8      |
|                     |                         |           |        | 0.40                | 10                      | Unknown primary                  | 0      | 4                                            | 17     |
|                     |                         |           |        | 0.50                | 16                      |                                  |        | 6                                            | 25     |
|                     |                         | 0.60      |        | 21                  |                         |                                  | 8      | 33                                           |        |
|                     |                         | 0.70      |        | 26                  |                         |                                  | 10     | 42                                           |        |
|                     |                         | 0.80      |        | 31                  |                         |                                  | 12     | 50                                           |        |
|                     |                         | 0.90      |        | 36                  |                         |                                  | 14     | 58                                           |        |
|                     |                         | 1.0       |        | 42                  |                         |                                  | 16     | 67                                           |        |
|                     |                         |           |        |                     |                         |                                  |        |                                              | 18     |
|                     |                         |           |        |                     |                         | 20                               | 83     |                                              |        |
|                     |                         |           |        |                     |                         | 22                               | 92     |                                              |        |
|                     |                         |           |        |                     |                         | 24                               | 100    |                                              |        |
| <b>Total Points</b> | 1-year Overall Survival |           |        | <b>Total Points</b> | 2-year Overall Survival |                                  |        |                                              |        |
| 137                 | 0.1                     |           |        | 113                 | 0.1                     |                                  |        |                                              |        |
| 126                 | 0.2                     |           |        | 102                 | 0.2                     |                                  |        |                                              |        |
| 117                 | 0.3                     |           |        | 93                  | 0.3                     |                                  |        |                                              |        |
| 109                 | 0.4                     |           |        | 84                  | 0.4                     |                                  |        |                                              |        |
| 100                 | 0.5                     |           |        | 76                  | 0.5                     |                                  |        |                                              |        |
| 91                  | 0.6                     |           |        | 67                  | 0.6                     |                                  |        |                                              |        |
| 80                  | 0.7                     |           |        | 56                  | 0.7                     |                                  |        |                                              |        |
| 65                  | 0.8                     |           |        | 41                  | 0.8                     |                                  |        |                                              |        |
| 42                  | 0.9                     |           |        | 18                  | 0.9                     |                                  |        |                                              |        |

**Supplementary Table S3.** Distribution of the total score within the study population

| Score                      | Training cohort<br><i>N</i> =172 | Validation Cohort<br><i>N</i> =90 | All Cohorts<br><i>N</i> =262 |
|----------------------------|----------------------------------|-----------------------------------|------------------------------|
| as a discrete variable     |                                  |                                   |                              |
| Median [Min, Max]          | 98.0 [19.0, 215]                 | 98.0 [25.0, 164]                  | 98.0 [19.0, 215]             |
| Median [IQR]               | 98.0 [78.0, 119]                 | 98.0 [74.0, 110]                  | 98.0 [78.0, 114]             |
| as a dichotomised variable |                                  |                                   |                              |
| Group A                    | 94 (54.7%)                       | 47 (52.2%)                        | 141 (53.8%)                  |
| Group B                    | 78 (45.3%)                       | 43 (47.8%)                        | 121 (46.2%)                  |

Group A, low-risk group; Group B, high-risk group.

**Supplementary Table S4.** The AUC for the OS nomogram and published prognostic score and regression model

| Prediction Period | AUC                        |                            |                            |
|-------------------|----------------------------|----------------------------|----------------------------|
|                   | Our final regression model | Published prognostic score | Published regression model |
| Training cohort   |                            |                            |                            |
| 6 months          | 0.78(0.69- 0.87)           | 0.64(0.53- 0.74)           | 0.60(0.48-0.72)            |
| 12 months         | 0.86(0.78-0.93)            | 0.69(0.60-0.79)            | 0.66(0.55-0.77)            |
| 24months          | 0.82(0.73- 0.91)           | 0.75(0.65-0.85)            | 0.76(0.65-0.88)            |
| Validation cohort |                            |                            |                            |
| 6 months          | 0.76(0.63-0.90)            | 0.80(0.69-0.92)            | 0.76(0.61-0.90)            |
| 12 months         | 0.82(0.70-0.93)            | 0.78(0.66-0.90)            | 0.71(0.56-0.87)            |
| 24 months         | 0.81(0.67-0.95)            | 0.74(0.60-0.88)            | 0.72(0.57-0.87)            |

AUC, area under the time-dependent receiver operating characteristic curve; OS, overall survival.
